# Supplementary material for: Incorporation of ZnO Nanoparticles into Soy Protein-Based Bioplastics to Improve Their Functional Properties
Source: PubMed Central journal article supplement (PMC7913798; doi:10.3390/polym13040486), 2021-02-04
Supplement: polymers-13-00486-s001.pdf [file polymers-13-00486-s001.pdf]

## Supporting Materials

# Incorporation of ZnO nanoparticles into soy protein-based bioplastics to improve their functional properties

Mercedes Jiménez Rosado <sup>1,\*</sup>, Víctor Perez-Puyana <sup>2</sup>, Pablo Sánchez-Cid <sup>2</sup>, Antonio Guerrero <sup>1</sup> and Alberto Romero <sup>2</sup>

<sup>1</sup> Department of Chemical Engineering, Escuela Politécnica Superior 41011 Sevilla, Spain, mjimenez42@us.es, aguerrero@us.es

<sup>2</sup> Department of Chemical Engineering, Facultad de Química 41012 Sevilla, Spain, vperez11@us.es, pabsanbue@alum.us.es, alromero@us.es

\* Correspondence: e-mail: mjimenez42@us.es Tel.: +34 954 557 179

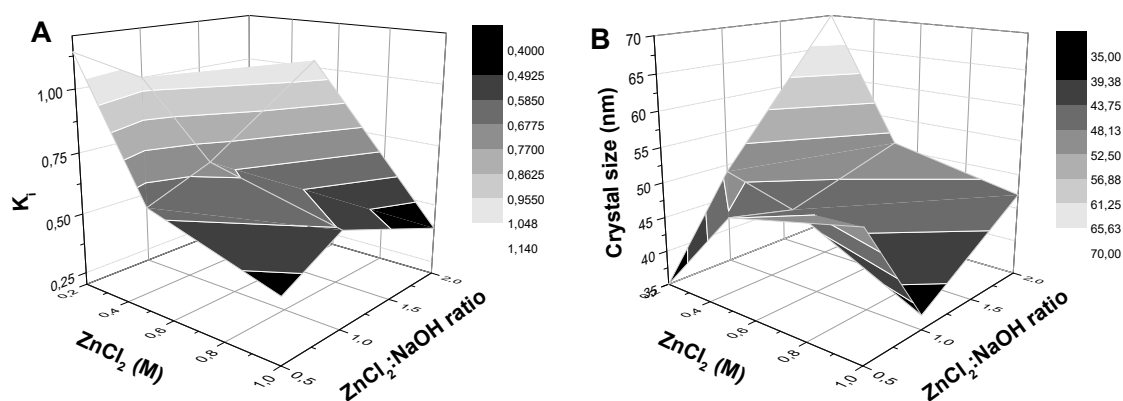

**Figure S1.** Yield ( $K_i$ , A) and crystal size (B) of nanoparticles processed at different  $ZnCl_2$  concentrations (0.2, 0.5 and 1.0 M) and  $ZnCl_2:NaOH$  ratios (0.5, 1.0 and 2.0).

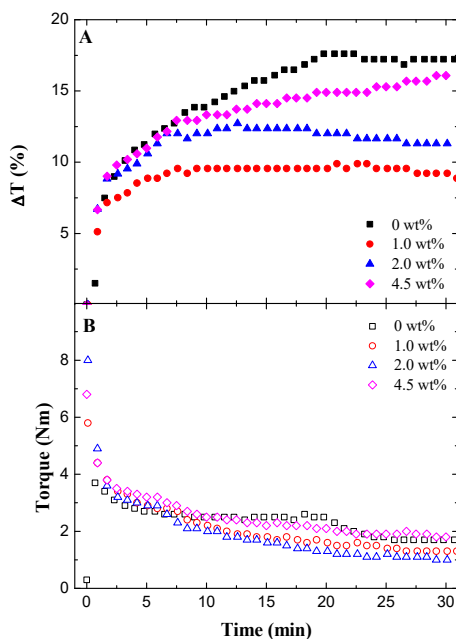

**Figure S2.** Temperature increment (A) and torque variation (B) of raw materials mixed at different nanoparticle concentrations (0, 1.0, 2.0 and 4.5 wt%).

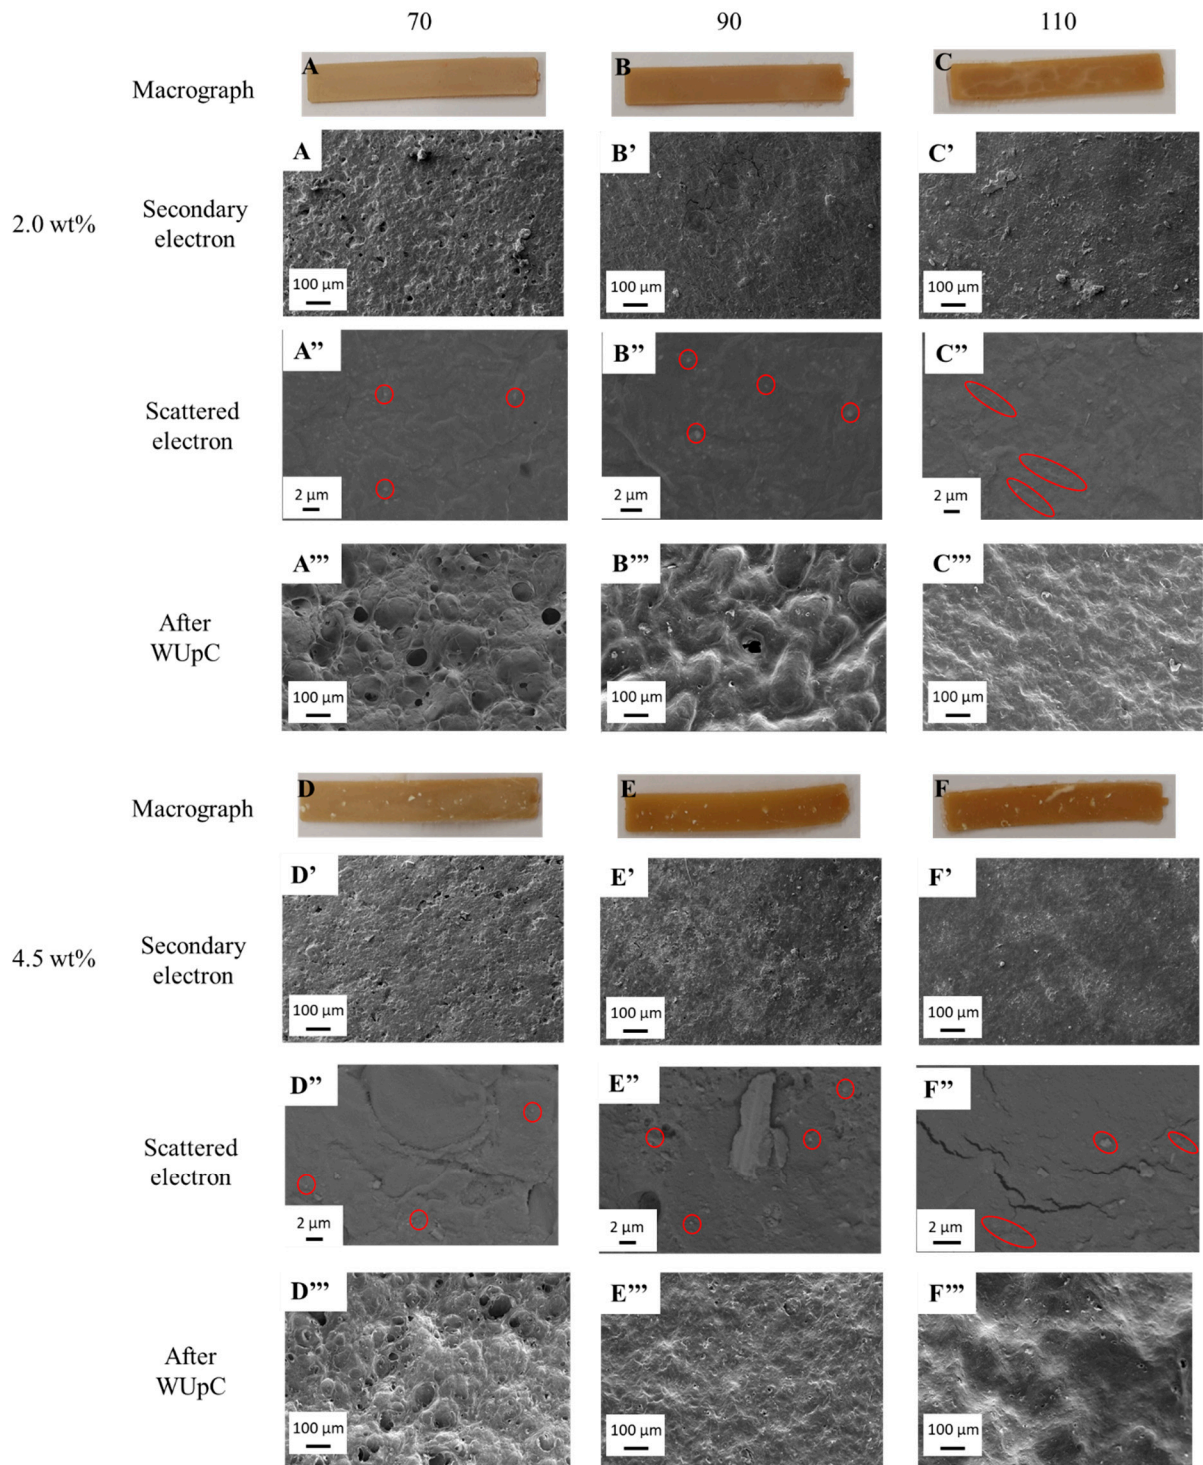

**Figure S3.** Macro and micrographs of bioplastics processed with 2.0 and 4.5 wt% of ZnO nanoparticles at different mould temperatures (70, 90 and 110 °C).

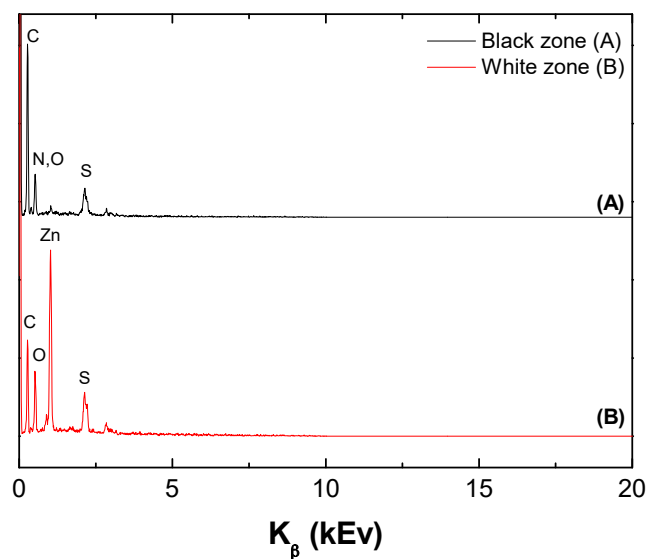

**Figure S4.** EDXA analyses of the different coloured zones (black and white zones) in a bioplastic matrix with nanoparticles incorporated.

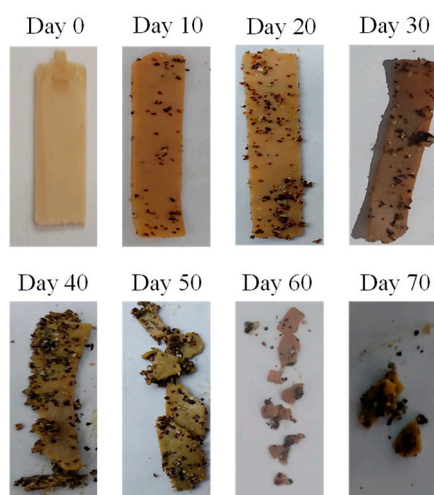

**Figure S5.** Biodegradability photographs of bioplastics with 1.0 wt% ZnO nanoparticles processed at 110 °C.
